# Supplementary material for: The Effect of Sow Maternal Behavior on the Growth of Piglets and a Genome-Wide Association Study
Source: MDPI journal article supplement (doi:10.3390/ani13243753), 2023-12-05
Supplement: s1 [file s1]

Table S1 List of potential candidate genes

| <b>Trait</b>        | <b>Chromosome</b> | <b>Candidate gene</b> |
|---------------------|-------------------|-----------------------|
| Biting piglets (BP) | Chr3              | <i>PLOD3</i>          |
|                     |                   | <i>ZNHIT1</i>         |
|                     |                   | <i>CLDN15</i>         |
|                     |                   | <i>FIS1</i>           |
|                     |                   | <i>IFT22</i>          |
|                     |                   | <i>COL26A1</i>        |
|                     |                   | <i>MYL10</i>          |
|                     |                   | <i>CUX1</i>           |
|                     |                   | <i>SH2B2</i>          |
|                     |                   | <i>PRKRIP1</i>        |
|                     |                   | <i>ORAI2</i>          |
|                     |                   | <i>ALKBH4</i>         |
|                     |                   | <i>LRWD1</i>          |
|                     |                   | <i>POLR2J</i>         |
|                     |                   | <i>RASA4B</i>         |
|                     |                   | <i>UPK3BL2</i>        |
|                     |                   | <i>UPK3B</i>          |
|                     |                   | <i>DTX2</i>           |
|                     |                   | <i>ZP3</i>            |
|                     |                   | <i>SSC4D</i>          |
|                     |                   | <i>YWHAG</i>          |
|                     |                   | <i>HSPB1</i>          |
|                     |                   | <i>SRRM3</i>          |
|                     |                   | <i>MDH2</i>           |
|                     |                   | <i>STYXL1</i>         |
|                     |                   | <i>TMEM120A</i>       |
|                     |                   | <i>POR</i>            |
|                     |                   | <i>RHBDD2</i>         |
|                     |                   | <i>CCL24</i>          |
|                     |                   | <i>CCL26</i>          |
|                     |                   | <i>HIP1</i>           |
|                     |                   | <i>POM121C</i>        |
|                     |                   | <i>NSUN5</i>          |
|                     |                   | <i>TRIM50</i>         |
|                     |                   | <i>FKBP6</i>          |
|                     |                   | <i>FZD9</i>           |
|                     |                   | <i>BAZ1B</i>          |
|                     |                   | <i>TBL2</i>           |
|                     |                   | <i>BCL7B</i>          |
|                     |                   | <i>MLXIPL</i>         |
|                     |                   | <i>VPS37D</i>         |
|                     |                   | <i>DNAJC30</i>        |

---

|       |                     |
|-------|---------------------|
| Chr11 | <i>BUD23</i>        |
|       | <i>TPP2</i>         |
|       | <i>METTL21C</i>     |
|       | <i>CCDC168</i>      |
|       | <i>TEX30</i>        |
|       | <i>POGLUT2</i>      |
|       | <i>BIVM</i>         |
|       | <i>ERCC5</i>        |
|       | <i>SLC10A2</i>      |
|       | <i>SYNPO2</i>       |
| Chr8  | <i>SEC24D</i>       |
|       | <i>METTL14</i>      |
|       | <i>PRSS12</i>       |
|       | <i>NDST3</i>        |
|       | <i>TRAM1L1</i>      |
| Chr13 | <i>SLC5A3</i>       |
|       | <i>MRPS6</i>        |
|       | <i>KCNE2</i>        |
|       | <i>SMIM11</i>       |
|       | <i>C13H21orf140</i> |
|       | <i>SMIM34</i>       |
|       | <i>KCNE1</i>        |
|       | <i>RCAN1</i>        |
|       | <i>CLIC6</i>        |
|       | <i>RUNX1</i>        |
| Chr12 | <i>SETD4</i>        |
|       | <i>SRR</i>          |
|       | <i>TSR1</i>         |
|       | <i>SGSM2</i>        |
|       | <i>MNT</i>          |
|       | <i>METTL16</i>      |
|       | <i>PAFAH1B1</i>     |
|       | <i>CLUH</i>         |
|       | <i>RAP1GAP2</i>     |
|       | <i>SPATA22</i>      |
|       | <i>ASPA</i>         |
|       | <i>TRPV3</i>        |
|       | <i>TRPV1</i>        |
|       | <i>SHPK</i>         |
|       | <i>CTNS</i>         |
|       | <i>TAX1BP3</i>      |
|       | <i>EMC6</i>         |
|       | <i>P2RX5</i>        |
|       | <i>ITGAE</i>        |

---

---

|                             |       |                   |
|-----------------------------|-------|-------------------|
|                             |       | <i>HASPIN</i>     |
|                             |       | <i>NCBP3</i>      |
|                             |       | <i>CAMKK1</i>     |
|                             |       | <i>P2RX1</i>      |
|                             |       | <i>ATP2A3</i>     |
|                             |       | <i>ZZEF1</i>      |
|                             |       | <i>CYB5D2</i>     |
|                             |       | <i>ANKFY1</i>     |
|                             |       | <i>UBE2G1</i>     |
|                             |       | <i>SPNS3</i>      |
| Crushing piglets (CP)       | Chr17 | <i>CLDN23</i>     |
|                             |       | <i>PRAG1</i>      |
|                             |       | <i>TRMT9B</i>     |
|                             |       | <i>DLC1</i>       |
|                             |       | <i>C17H8orf48</i> |
|                             |       | <i>SGCZ</i>       |
|                             |       | <i>TRNAE-UUC</i>  |
| Tramplng piglets (TP)       | Chr15 | <i>IRS1</i>       |
|                             |       | <i>RHBDD1</i>     |
|                             |       | <i>COL4A4</i>     |
|                             |       | <i>COL4A3</i>     |
|                             |       | <i>MFF</i>        |
|                             |       | <i>TM4SF20</i>    |
|                             |       | <i>AGFG1</i>      |
|                             |       | <i>SLC19A3</i>    |
|                             |       | <i>CCL20</i>      |
|                             |       | <i>DAW1</i>       |
|                             |       | <i>SPHKAP</i>     |
|                             | Chr3  | <i>DCDC2C</i>     |
|                             |       | <i>ALLC</i>       |
|                             |       | <i>COLEC11</i>    |
|                             |       | <i>RPS7</i>       |
|                             |       | <i>RNASEH1</i>    |
|                             |       | <i>ADI1</i>       |
|                             |       | <i>TRAPPC12</i>   |
|                             |       | <i>EIPR1</i>      |
|                             |       | <i>MYT1L</i>      |
|                             |       | <i>PXDN</i>       |
|                             |       | <i>TPO</i>        |
|                             |       | <i>TMEM18</i>     |
|                             |       | <i>ALKAL2</i>     |
|                             |       | <i>ACP1</i>       |
|                             |       | <i>SH3YL1</i>     |
| Piglets screaming test (ST) | Chr14 | <i>PANK1</i>      |

---

---

|                |
|----------------|
| <i>KIF20B</i>  |
| <i>HTR7</i>    |
| <i>RPP30</i>   |
| <i>ANKRD1</i>  |
| <i>PCGF5</i>   |
| <i>HECTD2</i>  |
| <i>PPP1R3C</i> |
| <i>TNKS2</i>   |

---

Table S2: List of candidate genes enrichment neurodegeneration pathways.

| KEGG_class                          | Pathway                                           | Pathway_ID | Genes                             |
|-------------------------------------|---------------------------------------------------|------------|-----------------------------------|
| Signaling molecules and interaction | Neuroactive ligand-receptor interaction           | ko04080    | <i>P2RX5, P2RX1, HTR7, TRPV1</i>  |
| Neurodegenerative disease           | Pathways of neurodegeneration - multiple diseases | ko05022    | <i>ATP2A3, HIP1, UBE2G1, FZD9</i> |
| Neurodegenerative disease           | Alzheimer disease                                 | ko05010    | <i>ATP2A3, IRS1, FZD9</i>         |
| Neurodegenerative disease           | Spinocerebellar ataxia                            | ko05017    | <i>ATP2A3</i>                     |
| Neurodegenerative disease           | Huntington disease                                | ko05016    | <i>POLR2J, HIP1</i>               |
| Neurodegenerative disease           | Parkinson disease                                 | ko05012    | <i>UBE2G1</i>                     |
| Neurodegenerative disease           | Amyotrophic lateral sclerosis                     | ko05014    | <i>POM121C</i>                    |
| Nervous system                      | Neurotrophin signaling pathway                    | ko04722    | <i>SH2B2, IRS1</i>                |

---

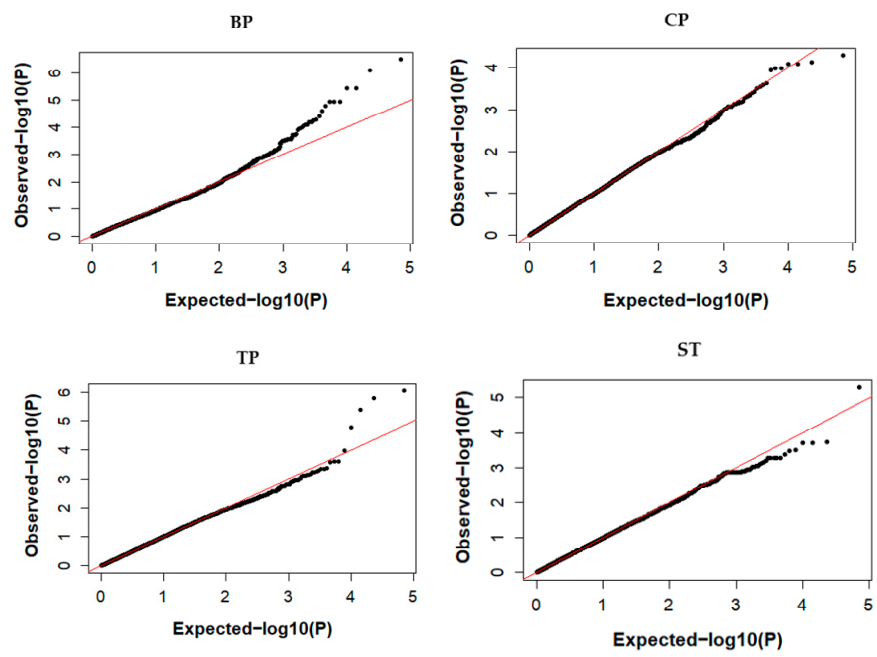

Figure S1. The Q-Q plots of four maternal behavior traits.
